# Supplementary material for: B cell–derived IL-6 initiates spontaneous germinal center formation during systemic autoimmunity
Source: PubMed Central journal article supplement — J Exp Med. 2017 Nov 6;214(11):3207–17. doi: 10.1084/jem.20170580 (PMC5679179; doi:10.1084/jem.20170580), 2017-11-06
Supplement: JEM_20170580_sm.pdf [file JEM_20170580_sm.pdf]

## SUPPLEMENTAL MATERIAL

Arkatkar et al., <https://doi.org/10.1084/jem.20170580>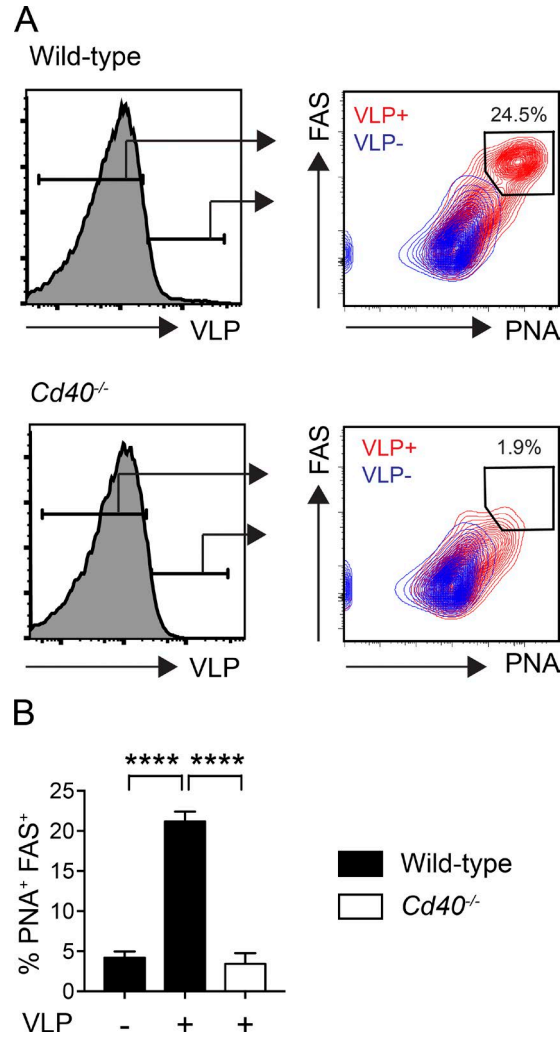

Figure S1. **Q $\beta$ -specific B cells are recruited into the GC compartment after Q $\beta$ -VLP immunization.** (A, left) Representative FACS plots (gated on splenic CD19<sup>+</sup> B cells) showing gating strategy to identify Q $\beta$ -VLP<sup>+</sup> and Q $\beta$ -VLP<sup>-</sup> B cells. (A, right) Representative, overlaid FACS plots showing Q $\beta$ -VLP<sup>+</sup> (red) versus Q $\beta$ -VLP<sup>-</sup> (blue) B cells 12 d after immunization of WT (top) and *Cd40*<sup>-/-</sup> (bottom) mice. Notably, a significant subset of Q $\beta$ -specific B cells adopted a PNA<sup>+</sup>FAS<sup>+</sup> GC phenotype in WT, but not *Cd40*<sup>-/-</sup>, animals. Number equals the percentage of Q $\beta$ -VLP<sup>+</sup> B cells within the PNA<sup>+</sup>FAS<sup>+</sup> gate. (B) Percentage Q $\beta$ -specific B cells within the PNA<sup>+</sup>FAS<sup>+</sup> GC compartment in WT (black) and *Cd40*<sup>-/-</sup> (white) mice after immunization with Q $\beta$ -VLP (+) or PBS control (-). Error bars indicate means  $\pm$  SEM. \*\*\*\*,  $P < 0.0001$ , by one-way ANOVA and Tukey's multiple comparison test. Data are representative of two independent experiments ( $n = 6$  per genotype).
